## Association of *Giardia lamblia* Infection with Child Growth Impairment

Afrin Sultana Chowdhury<sup>1</sup>, Emtiaz Ahmed<sup>2</sup>, Nazneen Nahar Islam<sup>3\*</sup>

<sup>1</sup> Department of Biotechnology and Genetic Engineering, Noakhali Science and Technology University, Bangladesh

<sup>2</sup> Australian Institute for Bioengineering and Nanotechnology, University of Queensland, Australia

<sup>3</sup> Department of Genetic Engineering and Biotechnology, University of Chittagong, Bangladesh

---

### **Abstract**

**Background:** In recent days, *Giardia lamblia*, as a diarrhea causing parasite has got attention worldwide, especially in developing and poor economical countries. Besides, contribution of this parasite in impaired nutritional status of children has also been documented. The aim of the present study was to evaluate the epidemiology of *G. lamblia* infection in 7-12 months old children living in two rural and urban sites of Bangladesh and to investigate the role of giardiasis in impaired nutritional status of children.

**Methods and findings:** Two hundred 7-12 months old children living in rural and urban sites of Bangladesh were followed for six months, by every-other-day home visits. *G. lamblia* was identified in diarrheal and monthly surveillance stools by Real-time PCR; and nutritional status was measured by WHO Anthro software, version 3.2.2. Anthropometric data were expressed as z-scores for weight for age (WAZ), height for age (HAZ), and weight for height (WHZ) parameters. In the first 7-12 months of life, prospective observation of infants in an urban slum and a rural area of Bangladesh demonstrated that 56% of children experienced at least one infection with *G. lamblia*. Recurrent giardiasis was also observed (22%). *G. lamblia* burden was found associated with low weight (malnutrition) (odds ratio 2.331, 95% CI 1.155, 4.705,  $p = 0.018$ ) and decreased height (stunting) (odds ratio 2.148, 95% CI 1.093, 4.221,  $p = 0.027$ ).

**Conclusions:** This study demonstrates the association of giardiasis with the development of child malnutrition and stunting, which points to the potential for *G. lamblia* infection interventions in the prevention and treatment of malnutrition.

**Keywords:** *Giardia lamblia*; malnutrition; growth impairment

### **Author summery**

*Giardia lamblia* is a major public health concern in both developed and developing nations due to its association of causing diarrhea. Link of *G. lamblia* causing infection (Giardiasis) with impaired growth of children and weakened socio-economic development makes the situation even more complicated, especially in developing countries, like Bangladesh. In 2004, *Giardia* was included in the WHO Neglected Diseases Initiative which also indicates its link with poverty. In the present study 1300 diarrheal and non-diarrheal fecal samples were collected from 200 children living in two rural and urban sites of Bangladesh. Anthropometric measurements, consisting of length and weight, were taken once in every three months. The DNA was isolated from the stool samples and presence of *G. lamblia* was then assessed by Real Time PCR. Use of very specific and sensitive RT-PCR technique helped to correctly identify the number of parasite detection. Infection rate was 64% and 48% for urban and rural area respectively. Children in this cohort had significant rates of malnutrition compared to the WHO reference population. A majority of children were infected with *G. lamblia*, and it was also found that children who had at least one infection with *G. lamblia* during the one year follow up period were significantly more likely to have low weight (malnutrition) and decreased height (stunting) by age 12 months.

### **Introduction**

Diarrheal disease is the second leading cause of morbidity and mortality in children under five years old in developing countries. Each year, an estimated 2.5 billion cases of diarrhea occur among children under five years of age<sup>1</sup>. The most recently published report of World Health Organization estimates that approximately 760,000 children were killed every year due to this

reason<sup>2</sup>. More than half of these cases are in South Asia and Africa. In Bangladesh, 1 in 30 children dies of diarrhea or dysentery by his or her fifth birthday<sup>3</sup>. The etiological agents of diarrhea include viruses, bacteria, and parasites<sup>1</sup>. Among protozoan parasites, *Giardia lamblia* (syn. *G. duodenalis* or *G. intestinalis*) is considered to be the most common and important<sup>4,5</sup>.

As of 2004, *G. lamblia* was included in the World Health Organization's Neglected Disease Initiative, due to the way the parasite seems to flourish in developing countries, together with the general lack of knowledge behind the molecular mechanism of the disease<sup>6</sup>. Giardiasis may range from asymptomatic to chronic or severe diarrhea and chronic disorders post-infection have been documented. Asymptomatic hosts may still shed infectious cysts and act as a transmission vehicle for the disease<sup>7</sup>. The infectious dose has been described to be as low as 10 cysts<sup>8</sup>. The incidence of diarrheal diseases varies greatly with the seasons and a child's age.

In recent years by evaluating the overall picture of diarrheal diseases worldwide, *G. lamblia* is revealed as a major public health concern<sup>9</sup>. Association of giardiasis with the impaired growth and development of children makes the situation even more complicated, especially in developing countries, like Bangladesh. Among the diarrhea causing organism *G. lamblia* impacts the economic growth of a country by affecting the Disability Adjusted Life Year (DALY) rates<sup>10</sup>. This is precisely why Bangladesh needs its own information concerning the association of giardiasis with child malnutrition and stunting. We conducted the present study with an aim to investigate the association of *G. lamblia* infection with child growth. The current study also evaluated the burden, seasonal prevalence and infection occurring frequency of *G. lamblia* among the rural and urban children of Bangladesh. Association of age group and gender with giardiasis has also been examined.

## **Materials and methods**

### ***Study area***

The study area was Mirpur (Sector-11, avenue-5), an urban slum of Dhaka city and Mirzapur, a rural area of Tangail district. The majority of the inhabitants of the Mirpur site are of Bihare ethnic origin. This site is densely populated with more than 100000 of people. Mirzapur has a total area of 373.89 km<sup>2</sup> and 61479 households. As of the 1991 Bangladesh census, Mirzapur has a population of 337496. These areas were selected as the living conditions are unhygienic and the children there are mostly affected by diarrheal disease than the others.

### ***Data collection***

For each child detail information was taken from mother or guardian. Parents or guardians were informed of the purpose of the study. After taking written consent data were collected, which included sex, age at participation and clinical symptoms of diarrhea. Anthropometric measurements, consisting of length and weight, were taken once every three months. Each child was weighed on an electronic scale (Digital Baby & Toddler Scales, Seca 354). The length of the children was measured to the nearest centimeter (Infantometer Baby Board, Seca 416).

### ***Sample collection and analysis***

The samples were collected from January 2015 to December 2015 and preserved at -80°C refrigerators. The population of the study was 7-12 months old infants. Total 1300 stool samples from 200 children (female 112 and male 88) were collected from the urban (Mirpur) and rural (Mirzapur) sites. Among them, 728 and 572 samples were collected from the female and male children respectively.

Among the 1300 samples, 1200 were called Child Monthly Stool (CMS) and 100 were named as Child Diarrheal Stool (CDS). CMSs were collected on a monthly basis from each 200 children.

CDSs were collected only when diarrheal episodes of the children were reported by their parents or guardian or by direct examination by the field technicians. Samples were collected in a clean, leak proof, transparent fecal collection pot. After collection, the samples were carried out very carefully using ice box and dry ice from the Mirpur and Mirzapur sites respectively to the Emerging Infections and Parasitology lab of the International Center for Diarrheal Disease Research, Bangladesh. The sample containers were stored at the freezer at -80 degree C. In the laboratory, about 180-220 mg of frozen stool samples (thawed at room temperature) was transferred to a 2 ml screw cap tubes for DNA extraction. DNA extraction was done by using QIAamp® Fast DNA Stool Mini Kit (QIAGEN, Hilden, Germany) which was followed by Multiplex RT-PCR (Real-Time Polymerase Chain Reaction).

### ***Nutritional analysis***

Nutritional status was assessed by comparing examined children weight and height with the weight and height of the World Health Organization (WHO) reference population of the same age and sex, using WHO Anthro software, version 3.2.2<sup>11</sup>.

### ***Statistical analysis***

Anthropometric information, surveillance data, and clinical and laboratory findings were computed in data files using Microsoft Office Excel 2007. All data were double-checked before analysis. Statistical analyses of the data were performed using the IBM SPSS Statistics software version 22 (SPSS Inc., Chicago, IL, USA). Categorical data were compared by  $\chi^2$  analysis. P value is the indication of significance of specific correlations. P value <0.05 means significant correlation. In bivariate analysis, the dependent variables were the anthropometric parameters, while the independent variable was the *G. lamblia* infections. Means were compared through analysis of variance (ANOVA) and medians were determined by using Microsoft Office Excel

2007.

Anthropometric measures (height-for-age adjusted z-score or HAZ; weight-for-age adjusted z score or WAZ; weight-for-height adjusted z-score or WHZ) were evaluated both as continuous and categorical variables. Based on the cohort's distribution of anthropometric indices, child HAZ was into four categories: 1)  $HAZ > -1$ ;  $HAZ \leq -1$  and  $> -2$  (mild stunting);  $HAZ \leq -2$  and  $> -3$  (moderate stunting); and  $HAZ \leq -3$  (severe stunting), similar classification has been followed for child WAZ and WHZ.

### **Ethical approval**

The study was approved by the Research and Ethical Review Committees of the International Centre for Diarrhoeal Disease Research, Bangladesh (ICDDR, B). Informed written consent was obtained from parents or guardians for the participation of their child in the study.

### **Results**

#### ***Prevalence of *G. lamblia* determined by Real time PCR***

By the end of the follow up period, total 112 children (56.0%) experienced at least one or more episodes of giardiasis. In comparison to the rural area, the urban area reported more *G. lamblia* parasitized cases (48.0% vs. 64.0%).

#### ***Sex distribution***

From the result of RT-PCR, sex wise distribution of *G. lamblia* infection in children revealed that asymptomatic giardiasis was more frequent in females (60.7%) than in males (50.0%). However, no significant relation has been found between child sex and the burden of *G. lamblia* infection between 7-12 months age ( $P = 0.214$ ). In case of symptomatic giardiasis the risk was found almost similar for the male and female children, that is 14.8% and 12.5% respectively.

### ***Recurrent *G. lamblia* infection***

Of the 200 children with giardiasis during the six months follow up, 26 children experienced recurrent infections. Recurrent infection was higher among the urban site children. For the rural site no fifth or sixth time infection was documented (**Figure 1**).

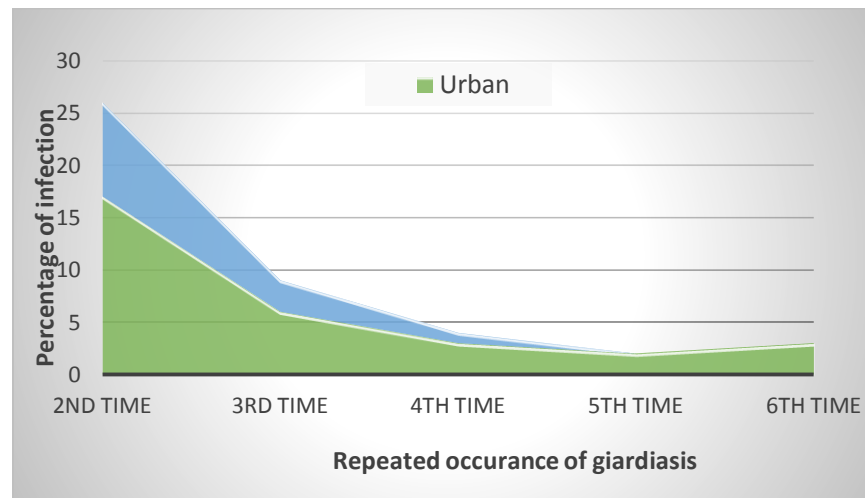

**Figure 1:** Repeated occurrence of Giardiasis among the children of urban (Mirpur) and rural (Mirzapur) site.

### ***Age group distribution and prevalence of *G. lamblia* infection***

The age range of the infected population was 7-12 months. This population was divided into 2 age groups (7-9; 10-12) in 3 months interval. In Mirpur (urban) site infection rate in the second age group (25.9%) was approximately the double of the first age group (14.6%). On the other hand Mirzapur (rural) site showed a decreased infection amount in the older age group (9.2%) than the younger age group (14.4%).

Among the 209 *G. lamblia* positive samples 93 (14.5%) samples were in 7-9 months age groups, 116 (17.6%) were in 10-12 age groups. However, no significant relation has been found between child age group and the overall *Giardia* infection between 7-12 months age ( $P = 0.321$ ).

### ***Symptomatic and asymptomatic giardiasis***

Non-diarrheal *G. lamblia* infection was found higher in the urban (Mirpur) site 133 (20%) than in the rural (Mirzapur) area 76 (12%). For symptomatic giardiasis the prevalence rate was almost similar, 16 (2.5%) and 11 (2%) for rural and urban area respectively (**Supplementary table 1**). Depending on age, two different patterns of *G. lamblia* prevalence have been found for the rural and urban areas. For the rural site the number of *G. lamblia* infection in children was lowered with the increase of age, while in the urban area the highest numbers of children (33%) were infected with asymptomatic giardiasis at their 12 months age (**Figure 2**).

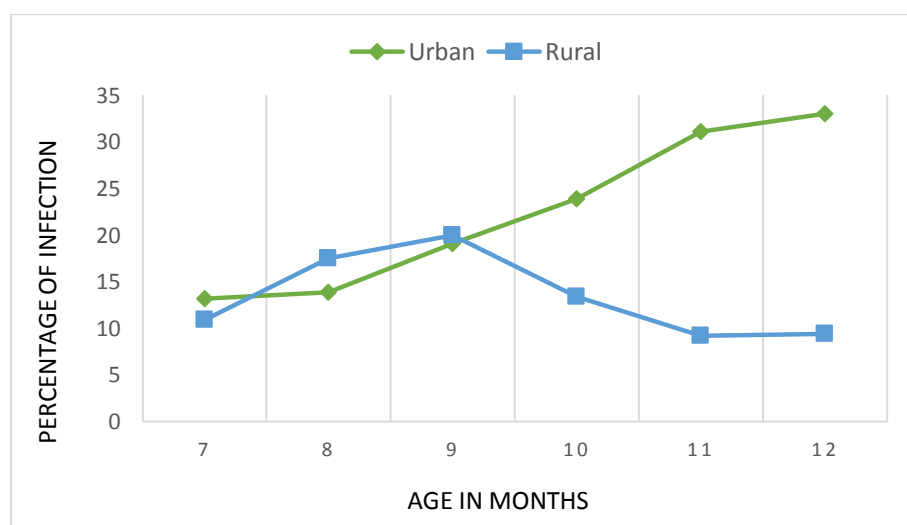

**Figure 2:** Burden of *G. lamblia* infection in infants over 7-12 months of age at the urban (Mirpur) and rural (Mirzapur) site.

### ***Seasonal prevalence***

Two different patterns of monthly prevalence of *G. lamblia* have been found for the rural and urban areas. For the rural site the overall number of *G. lamblia* infected children was lower in January followed by an increase in the subsequent months with a peak from August to December. The relationship between seasonal variance and *G. lamblia* prevalence was much more clearly defined in rural area than in the urban site, where the infection rate has been fluctuating all around the year. For the urban site an average detection rate of more than 10% in each month was very



common and showed the highest prevalence between July and January. The overall number of *G. lamblia* cases increased during the monsoon to post-monsoon period (i.e., from July to December) and at both sites the highest detection was observed in September (**Figure 3**). Symptomatic giardiasis did not found to be related with seasonality at any site ( $P > 0.05$ ).

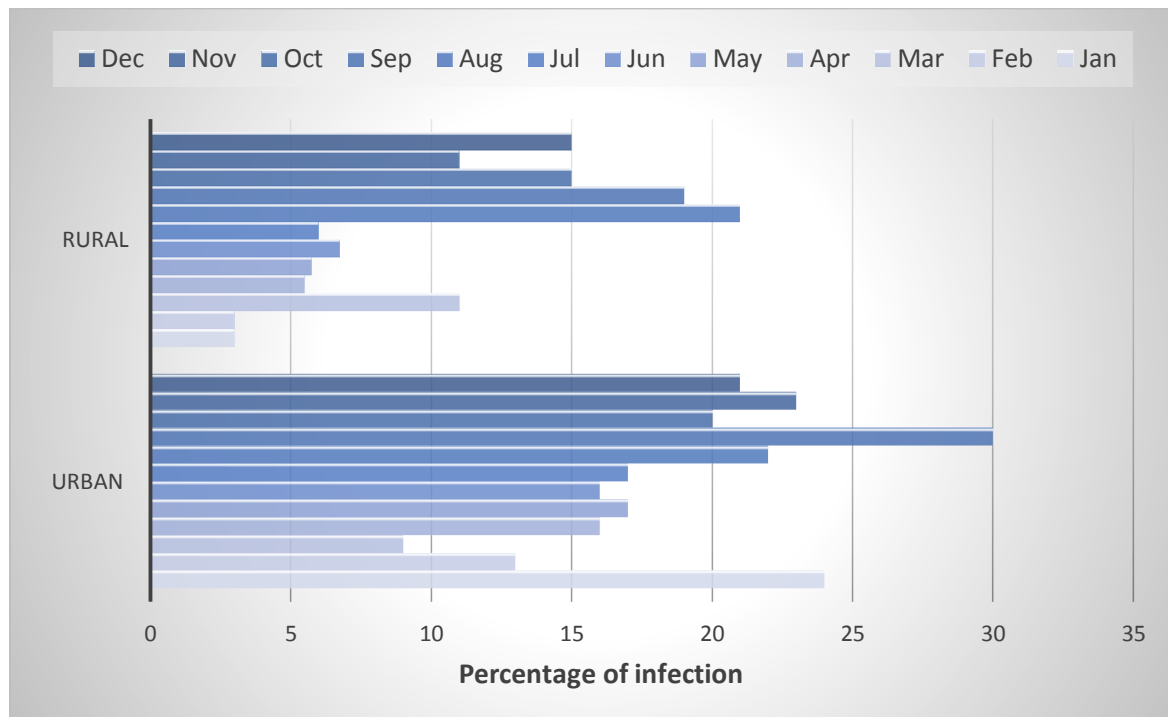

**Figure 3:** The burden of *G. lamblia* at each month of the year in 7-12 months aged children at the rural (Mirzapur) and urban (Mirpur) sites.

### *Attribution of giardiasis to child malnutrition and stunting*

#### Nutritional status of study children at birth and during follow-up

Poor nutritional status was common at birth and increased by 12 months of age ( $WAZ \leq -1$  and  $HAZ \leq -1$  are the indicator of underweight and stunted children respectively). From ages 0 to 6 months a catch-up in weight gain was seen; however, this was not sustained. At birth, 35.0% and 34.0% of the newborns had weight for age Z score (WAZ) and height for age Z score (HAZ) scores of  $\leq -1$  respectively. This worsened at 1 year of age when 51.5% and 46% of the children were

underweight or stunted, respectively (**Table 1**). For children weight for height Z score (WHZ) no significant change has been observed during the study period. **Figure 4** shows the steady decline in WAZ and HAZ from birth to 12 months of age.

**Table 1:** Association between age and nutritional status of the study population.

| Age              | Children No. (%) |                |               |               |               |              |
|------------------|------------------|----------------|---------------|---------------|---------------|--------------|
|                  | WAZ              |                | HAZ           |               | WHZ           |              |
|                  | > -1             | ≤ -1           | > -1          | ≤ -1          | > -1          | ≤ -1         |
| <b>0 day</b>     | 130<br>(65.0)    | 70<br>(35.0)   | 132<br>(66.0) | 68<br>(34.0)  | 139<br>(69.5) | 61<br>(30.5) |
| <b>6 months</b>  | 138<br>(69.0)    | 62<br>(31.0)   | 130<br>(65)   | 70<br>(35.5)  | 136<br>(68.0) | 64<br>(32.0) |
| <b>9 months</b>  | 116<br>(58.0)    | 84<br>(42.0)   | 119<br>(59.5) | 81<br>(40.5)  | 132<br>(66.0) | 68<br>(34.0) |
| <b>12 months</b> | 97<br>(48.5)     | 103*<br>(51.5) | 108<br>(54.0) | 92*<br>(46.0) | 141<br>(70.5) | 59<br>(29.5) |

**Note:** Total enrolled children = 200

**Abbreviations:** WAZ, weight for age Z score; HAZ, height for age Z score; WHZ, weight for height. WAZ > -1 means no malnutrition, WAZ ≤ -1 means malnutrition

HAZ > -1 means no stunting, HAZ ≤ -1 means stunting

WHZ > -1 means no wasting, WHZ ≤ -1 means wasting

Anthropometric analysis was done by WHO Anthro software, version 3.2.2

Statistical analysis was done by IBM SPSS Statistics software version 22

\*, P ≤ 0.05

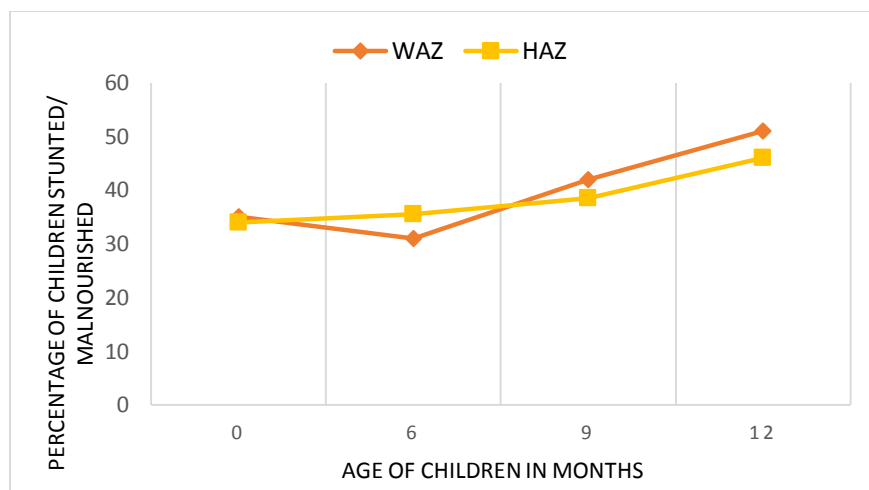

**Figure 4:** Percentage of malnourished ( $WAZ \leq -1$ ) and stunted ( $HAZ \leq -1$ ) children with increasing age, from birth to 12 months. HAZ and WAZ scores were determined using the World Health Organization's Anthro software, version 3.2.2.

The number of underweight and stunted children increased during the first year of life. 13.5% and 5.0% children met WHO guidelines for moderate to severe malnutrition (weight for-age adjusted z-score  $< -2$  for moderate and  $< -3$  for severe malnutrition) at birth. By one year, though the number of moderate and severely malnourished children decreased, mild malnutrition rate increased highly, from 16.5% at birth to 43.0% at the end of the study (**Table 2**). 22.5%, 10.0%, and 1.5% of children met WHO criteria for mild, moderate, and severe stunting at birth respectively (**Table 3**). Over the first one year of life, the mean height-for-age adjusted z-score (HAZ) in this cohort fell consistently below the WHO reference population. In case of the mean weight-for-height adjusted z-score (WHZ), an almost plateau phase has been found over the time period (**Table 4**).

**Table 2:** Number of malnourished children and severity of malnourishment at different ages

| Age in months | Weight for age Z score (WAZ) No (%) |                      |           |
|---------------|-------------------------------------|----------------------|-----------|
|               | $\leq -1$ and $> -2$                | $\leq -2$ and $> -3$ | $\leq -3$ |
| 0             | 33 (16.5)                           | 27 (13.5)            | 10 (5.0)  |
| 6             | 39 (19.5)                           | 18 (9.0)             | 5 (2.5)   |
| 9             | 65 (32.5)                           | 15 (7.5)             | 4 (2.0)   |
| 12            | 86 (43.0)                           | 11 (5.5)             | 6 (3.0)   |

**Note:**  $\leq -1$  and  $> -2$  means mild malnutrition;  $\leq -2$  and  $> -3$  means moderate malnutrition;  $\leq -3$  means severe malnutrition; total enrolled children= 200.

**Table 3:** Number of stunted children and severity of stunting at different ages

| Age in months | Height for age Z score (HAZ) No. (%) |                      |           |
|---------------|--------------------------------------|----------------------|-----------|
|               | $\leq -1$ and $> -2$                 | $\leq -2$ and $> -3$ | $\leq -3$ |
| 0             | 45 (22.5)                            | 20 (10.0)            | 3 (1.5)   |
| 6             | 42 (21.0)                            | 23 (11.5)            | 5 (2.5)   |
| 9             | 49 (24.5)                            | 27 (13.5)            | 5 (2.5)   |
| 12            | 51 (25.5)                            | 30 (15.0)            | 11 (5.5)  |

**Note:**  $\leq -1$  and  $> -2$  means mild stunting;  $\leq -2$  and  $> -3$  means moderate stunting;  $\leq -3$  means severe stunting; total enrolled children= 200

**Table 4:** Number of wasted children and the severity of wasting at different ages

| Age in months | Weight for height Z score (WHZ) No. (%) |                      |           |
|---------------|-----------------------------------------|----------------------|-----------|
|               | $\leq -1$ and $> -2$                    | $\leq -2$ and $> -3$ | $\leq -3$ |
| 0             | 32 (16.0)                               | 19 (9.5)             | 10 (5.0)  |
| 6             | 58 (29.0)                               | 6 (3.0)              | 0 (0.0)   |
| 9             | 60 (30.0)                               | 8 (4.0)              | 0 (0.0)   |
| 12            | 49 (24.5)                               | 10 (5.0)             | 0 (0.0)   |

**Note:**  $\leq -1$  and  $> -2$  means mild wasting;  $\leq -2$  and  $> -3$  means moderate wasting;  $\leq -3$  means severe wasting; total enrolled children =200

### Association between *G. lamblia* infection and nutritional status of children at age 12 months

Bivariate analysis through ANOVA showed significant correlation with child malnutrition and *G. lamblia* infection at their 7-12 months age ( $P = 0.018$ ). Similarly, the risk of stunting was higher in children with giardiasis ( $P = 0.027$ ). There was no significant association between recurrent *G. lamblia* infection and decreased HAZ and WAZ in children (**Table 5**).

**Table 5:** Association of single, recurrent and no *G. lamblia* infection with child malnutrition and stunting

| Characteristics                            | OR (95% CI) for WAZ $\leq -1$ ,<br>P Value | OR (95% CI) for HAZ $\leq -1$ ,<br>P Value |
|--------------------------------------------|--------------------------------------------|--------------------------------------------|
| Single giardiasis within<br>7-12 months    | 2.331 (1.155- 4.705), 0.018                | 2.148 (1.093-4.221), 0.027                 |
| Recurrent giardiasis within<br>7-12 months | 0.382 (0.2102- 0.5545), 0.497              | 0.546 (0.5267- 0.7656), 0.490              |
| No giardiasis                              | 0.516 (0.4767- 0.6748), 0.489              | 0.384 (0.3154- 0.5129), 0.496              |

**Note:** P value  $\leq 0.05$ = significant

**Abbreviations:** CI, confidence interval; OR, odds ratio; WAZ, weight for age Z score; HAZ, height for age Z score

### **Discussion**

In the present observation, *G. lamblia* infection has been found common, affecting more than half of the children enrolled in the study. This finding is higher than that reported among children in the United States<sup>12</sup> and Canada<sup>13</sup>. Haque *et al.* also reported 11.08% *G. lamblia* infection in 2–5 years old group in an urban slum area in Dhaka<sup>14</sup>. The reason behind the detection of higher burden of *G. lamblia* in the present study was the use of real time PCR technique which is more sensitive and specific than the microscopic stool examination and ELISA done in the above mentioned studies.

The prevalence of *G. lamblia* among rural and urban children was examined in the study. Before this no *G. lamblia* burden analysis among the rural children has been done in Bangladesh. *G. lamblia* has been found more common in urban than in rural children, 64% and 48% for urban and rural areas respectively. Apart from age and seasonal influence, risk factors for infection with *G. lamblia* was not analyzed in the present study, thus the main differences between the sources of transmission in the rural and urban communities remain unknown. Nevertheless, unsatisfactory sanitary condition and limited practice of drinking safe water may be translated into higher infection rate among the urban slum area children. Although family members were not tested for *G. lamblia* infection, children with *Giardia*-associated diarrhea were more likely to have a household member with a diarrheal illness suggests possible spread of *Giardia* within households, or perhaps a common point source exposure. Therefore, overcrowded condition of the urban slum and sharing a single room by many people could have resulted in repeated exposure and consequently contributed to the high prevalence.

Sex wise distribution of *G. lamblia* infection in children revealed that females were at higher risk for developing infection compared to males in asymptomatic condition. The difference was, however, not significant. Studies in Cuba, Kenya and Canada<sup>13,15,16</sup> have found controversial results to the male female ratio of giardiasis. The reasons may be due to the sample size, diagnostic techniques, social settings of Bangladesh and lack of proper care given to the female children. Risk of symptomatic giardiasis was found similar in both sexes.

Interestingly, a larger number of asymptomatic infections have been identified than diarrheal infections. Potentially, this is due to consistent monthly surveillance sample collection and use of RT-PCR for diagnosis, rather than microscopy or antigen detection. Recurrent *G. lamblia* infection was also observed in about 22% of the infected children.

In the present investigation, seasonal study of *G. lamblia* infection showed different patterns for the rural and urban sites. In the urban site infection rate fluctuated all the year round. However, a higher prevalence was documented from July to October. In the rural area the highest number of cases for giardiasis was recorded from August, the middle of the wet season, to the middle of the dry season in December. *G. lamblia* is waterborne and therefore, a high prevalence is expected in the wet season as transmission is likely to be high due to contamination of water supplies by water run-off after heavy rains. On the other side, in urban site the fluctuating condition of *G. lamblia* may be associated with the unhygienic and poor living conditions, including the lack of piped water inside the house, contaminated and hold back water near the slum, poor sewerage system, garbage and dumps near the dwelling. Due to the low number of *G. lamblia* positive diarrheal cases, any significant seasonal prevalence of *G. lamblia* among the symptomatic children could not be shown.

Although the prevalence of *G. lamblia* according to age group was not statistically significant, a slightly higher prevalence was observed among children aged ten to twelve months old than the age group seven to nine months old. One reason of this is may be the transmission of *G. lamblia* through food and water, as after six months, with the increase of age children start to take other foods along with breastfeeding. The other possible reasons may also be related with lack of effective immunity and children habits (e.g. sharing things among themselves, putting objects into the mouth, etc.).

One of the most significant findings of this study was the predisposition towards linear growth faltering that occurred in *G. lamblia* infected children. Children who had at least one *G. lamblia* infection in their first one year of life had significantly worse nutritional status at 12 months, suggesting that *G. lamblia* infection is associated with downstream growth faltering. Among 200

children in the study 103 and 92 children were suffered with malnutrition and stunting respectively at their 12 months age. The association between *G. lamblia* infection and child malnutrition and stunting was found significant by considering the P value. This is a significant observation because it indicates that successful treatment of malnutrition may in part require prevention or treatment of *G. lamblia* infection in order to prevent gut barrier dysfunction. It is also proposed that malnutrition and stunting, rather than diarrhea, should be considered the most important outcome of *G. lamblia* infection in children.

The present study determined that *G. lamblia* infection was not a predictor of being wasted. Perhaps the wasted children progressively adapt until maximum adaptation is reached even in the presence of infection. Thus, children may appear to have normal weight-for-height (wasting), but, in reality, they have very low stature that only becomes visible at a later stage of development. This situation has been referred to as “homeorhesis”<sup>17</sup>.

In the present population though non-diarrheal *G. lamblia* infection was found correlated with poor nutritional status, no relationship has been identified between *G. lamblia* diarrheal infections and decreased height-for-age adjusted z-score (HAZ) and weight-for-height adjusted z-score (WAZ) at 12 months. Therefore, it could be concluded that it is the presence of *G. lamblia* infection, rather than the phenotype of diarrhea, that is contributing to malnutrition and stunting. This is also supported by prior studies from Brazil, Malaysia and Colombia those have been shown that children with asymptomatic *G. lamblia* infection had less weight and height gain<sup>18-20</sup>.

The present study has some limitations. The ability to determine the true nutritional status of the population was limited by the use of a cross-sectional study design. To overcome this limitation, a longitudinal study would be performed in future which may permit visualization of the changes in weight, height and growth over time, which are better indicators of malnutrition patterns.



Strength of the study includes exclusion of children with extreme malnutrition and stunting at birth, as the authors were interested in controlling for perinatal factors that may have led to malnutrition or stunting at birth. In the present study anthropometric information had been collected since birth, it was therefore easy to differentiate between the children malnourished or stunted at birth and those who developed malnutrition or stunting perinatally.

For children there is arguably no problem more important than poor nutritional status. Almost one-third of children in the developing world are malnourished. Poor nutrition is linked to up to half of all child deaths worldwide. In the first 2 years of life, malnutrition leads to damage in cognitive function and physical capacity<sup>21</sup>. The current study was an attempt to fill the knowledge gap of how to intervene in malnutrition by demonstrating the contribution of enteric *G. lamblia* infection. The present findings do not provide evidence that *G. lamblia* infection is the crucial factor of malnutrition and stunting among the children in this study. However, it is very probable that *G. lamblia* infection is one of major factors associated with low nutritional status, together with sanitary and socioeconomic conditions. Results presented in this study provide new information about endemicity of *G. lamblia* infections in 7-12 months old children from rural and urban areas of Bangladesh. Such data are essential for future preventive measures. Together these findings suggest that, successful treatment of malnutrition may in part require for the prevention or treatment of *G. lamblia* infection. It is also proposed that malnutrition and stunting, rather than diarrhea, should be considered the most important outcome of *G. lamblia* infection in children.

### **Conclusion**

This study concluded that, successful treatment of malnutrition may in part require prevention or treatment of *G. lamblia* infection in order to prevent gut barrier dysfunction. It is also proposed

that malnutrition and stunting, rather than diarrhea, should be considered the most important outcome of *G. lamblia* infection in children.

### **Acknowledgements**

We acknowledge with gratitude Dr. Rashidul Haque, senior scientist and head of Emerging Infection and Parasitology lab, icddr,b for the laboratory support and his guidance. We also thank the babies who participated in the study. We would also like to thank the field staffs and all of those involved in the data collection.

**Conflicts of Interest:** None to declare

**Source of funding:** This work was funded by the International Centre for Diarrhoeal Disease Research, Bangladesh (ICDDR, B).

**Authors' contributions:** ASC performed the experiments. ASC and EA analysed and interpreted the data. ASC wrote the first draft of the manuscript. NNI corrected the draft manuscript and was engaged in overall supervision of the study. All authors were involved in subsequent revisions of the manuscript for important intellectual content and have read and approved this final version to be published.

### **References**

1. Thielman NM, Guerrant RL. Acute infectious diarrhea. *New Engl J Med*. 2004; **350**: 38-47.
2. WHO. Diarrheal Disease 2013. Geneva: World Health Organization; 2013.
3. Petri WA, Haque R, Lyerly D, Vines RR. Estimating the impact of amebiasis on health. *Parasitol Today*. 2000; **16**: 320-321.
4. Haque R, Mondal D, Kirkpatrick BD, Akther S, Farr BM, Sack RB, et al. Epidemiologic and

- clinical characteristics of acute diarrhea with emphasis on *Entamoeba histolytica* infections in preschool children in an urban slum of Dhaka, Bangladesh. *Am J Trop Med Hyg.* 2003; **69**: 398-405.
5. Ortega YR, Adam RD. Giardia: overview and update. *Clin Infect Dis.* 1997; **25**: 545-549.
  6. Savioli L, Engels D, Daumerie D, Jannin J, Alvar J, Asiedu K, et al. Response from Savioli and Colleagues from the Department of Neglected Tropical Diseases, World Health Organization. *PLoS Med.* 2006; **3**: 283.
  7. Hanevik K, Hausken T, Morken MH, Strand EA, Mørch K, Coll P, et al. Persisting symptoms and duodenal inflammation related to *Giardia duodenalis* infection. *J Infection.* 2007; **55**: 524-530.
  8. Rendtorff RC. The experimental transmission of human intestinal protozoan parasites. II. *Giardia lamblia* cysts given in capsules. *Am J Hyg.* 1954; **59**: 209-20.
  9. Hoque ME, Hope VT, Kjellström T, Scragg R, Lay-Yee R. Risk of giardiasis in Aucklanders: a case—control study. *Int J Infect Dis.* 2002; **6**: 191-197.
  10. Adam RD. Biology of *Giardia lamblia*. *Clin Microbiol Rev.* 2001; **14**: 447-475.
  11. Blössner M, Siyam A, Borghi E, Onyango A, de Onis M. WHO AnthroPlus for personal computers manual: software for assessing growth of the world's children and adolescents. World Health Organization: Geneva, Switzerland; 2009
  12. Kappus KD, Lundgren Jr RG, Juranek DD, Roberts JM, Spencer HC. Intestinal parasitism in the United States: update on a continuing problem. *Am J Trop Med Hyg.* 2004; **50**: 705-713.
  13. Wallis PM, Erlandsen SL, Isaac-Renton JL, Olson ME, Robertson WJ, Van Keulen H. Prevalence of *Giardia* cysts and *Cryptosporidium* oocysts and characterization of *Giardia* spp. isolated from drinking water in Canada. *Appl Environ Microb.* 1996; **62**: 2789-2797.

14. Haque R, Ali IM, Sack RB, Farr BM, Ramakrishnan G, Petri WA. Amebiasis and mucosal IgA antibody against the *Entamoeba histolytica* adherence lectin in Bangladeshi children. *J Infect Dis.* 2001; **183**: 1787-1793.
15. Gray SF, Gunnell DJ, Peters TJ. Risk factors for giardiasis: a case-control study in Avon and Somerset. *Epidemiol Infect.* 1994; **113**: 95-102.
16. Huang DB, White AC. An updated review on *Cryptosporidium* and *Giardia*. *Gastroentero Clin North America.* 2006; **35**: 291-314.
17. Bauman JG, Wiegant J, Borst P, van Duijn P. A new method for fluorescence microscopical localization of specific DNA sequences by in situ hybridization of fluorochrome labelled RNA. *Exp Cell Res.* 1980; **128**: 485-90.
18. Newman RD, Moore SR, Lima AA, Nataro JP, Guerrant RL, Sears CL. A longitudinal study of *Giardia lamblia* infection in north-east Brazilian children. *Trop Med Int Health.* 2001; **6**: 624-634.
19. Al-Mekhlafi MH, Azlin M, Aini UN, Shaik A, Sa'iah A, Fatmah MS, et al. Giardiasis as a predictor of childhood malnutrition in Orang Asli children in Malaysia. *T Roy Soc Trop Med H.* 2005; **99**: 686-691.
20. Botero-Garcés JH, García-Montoya GM, Grisales-Patiño D, Aguirre-Acevedo DC, Álvarez-Uribe MC. *Giardia intestinalis* and nutritional status in children participating in the complementary nutrition program, Antioquia, Colombia, May to October 2006. *Rev I Med Trop.* 2009; **51**: 155-162.
21. Roxström-Lindquist K, Palm D, Reiner D, Ringqvist E, Svärd SG. *Giardia* immunity—an update. *Trends Para.* 2006; **22**: 26-31.
